## Erratum

KAZEM SADEGH-ZADEH  
THE PROTOTYPE RESEMBLANCE THEORY OF DISEASE  
J Med Philos, 2008; 33: 106–139; doi:10.1093/jmp/jhn004.

The following sentence on page 134 in Hypothesis 2 should have read:

Hypothesis 2.  $\langle \mathcal{H}, \{D_1, \dots, D_n\}, \mathcal{D}, \text{simil}, \text{West Europeans} \rangle$  is a fuzzy prototype resemblance frame.

The publisher regrets this error.
